# Supplementary material for: Heterogeneity of polyoxometalates by confining within ordered mesopores: toward efficient oxidation of benzene to phenol
Source: Royal Society of Chemistry journal article supplement (doi:10.1039/c9cy00288j), 2019-01-01
Supplement: c9cy00288j1.pdf [file c9cy00288j1.pdf]

## Supporting Information

### Heterogeneity of Polyoxometalates by Confining within Ordered Mesopores: Toward Efficient Oxidation of Benzene to Phenol

Yan Leng,<sup>[a,c]</sup> Yucheng Jiang,<sup>[a]</sup> Honggeng Peng,<sup>[d]</sup> Zihao Zhang,<sup>[c]</sup> Miaomiao Liu,<sup>[c]</sup> Kecheng Jie,<sup>[c]</sup> Pengfei Zhang,\*<sup>[b,c]</sup> and Sheng Dai\*<sup>[c,d]</sup>

<sup>[a]</sup> The Key Laboratory of Synthetic and Biological Colloids, Ministry of Education, School of Chemical and Material Engineering, Jiangnan University, Wuxi 214122, Jiangsu, China.

<sup>[b]</sup> School of Chemistry and Chemical Engineering, Shanghai Jiao Tong University, Address Shanghai 200240, P. R. China. E-mail: chemistryzpf@sjtu.edu.cn

<sup>[c]</sup> Department of Chemistry, University of Tennessee, Knoxville, TN 37996, USA.

<sup>[d]</sup> Chemical Sciences Division, Oak Ridge National Laboratory Knoxville, TN 37831, USA. E-mail: dais@ornl.gov

#### Characterization

N<sub>2</sub> adsorption–desorption analysis was performed using a TriStar (Micromeritics Instrument Corp.; Norcross, GA, USA) at 77 K, equipped with automated surface area and pore size analyzer. All samples were degassed at 180 °C for 24 h before analysis. Fourier transform infrared spectrum (FTIR) was collected by PerkinElmer Frontier Fourier transform infrared spectrometer. TG analysis was carried out with a STA409 instrument in dry air at a heating rate of 5 °C/min. The electron spin resonance (ESR) spectra were measured on a Bruker EMX-10/12 spectrometer at X-band. X-ray photoelectron spectroscopy (XPS) was conducted on a PHI 5000 Versa Probe X-ray photoelectron spectrometer equipped with Al K $\alpha$  radiation (1486.6 eV). Transmission electron microscopy (TEM) images were recorded with a Tecnai G2 F30 S-Twin electron microscope. STEM images were recorded on a Nion UltraSTEM 200 microscope operated at 200 kV. Powder X-ray diffraction (XRD) were measured on a Bruker D8 diffractometer equipped with scintillation counter. The adsorption kinetics experiments for benzene was determined by UV-visible spectrometer (Hitachi U-2900).

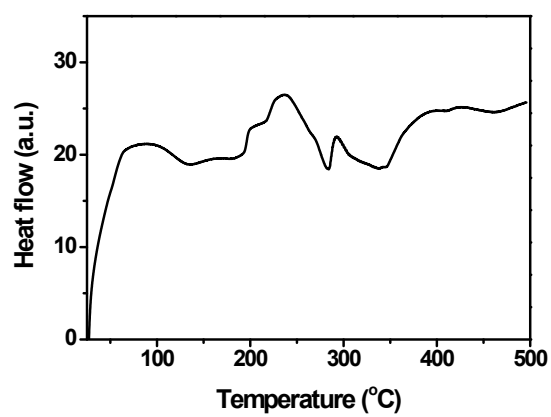

Figure S1. DSC analysis for PMo<sub>1</sub>@OMP.

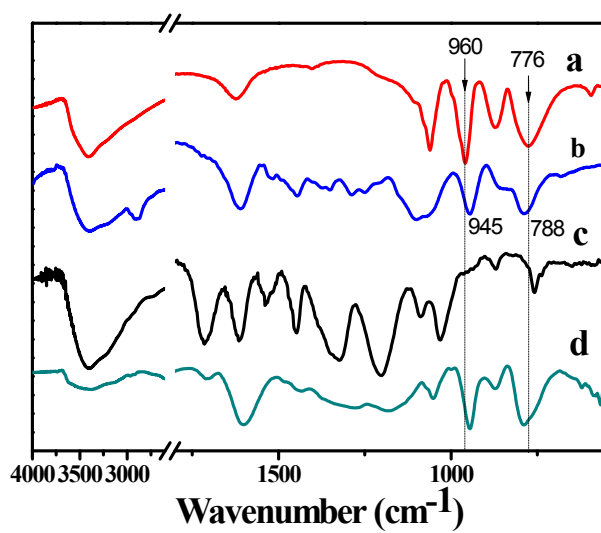

Figure S2. FT-IR spectra of (a) H<sub>3</sub>PMo<sub>12</sub>O<sub>40</sub>, (b) PMo-AP-tannin-F127, (c) tannin and (d) PMo<sub>1</sub>@OMP.

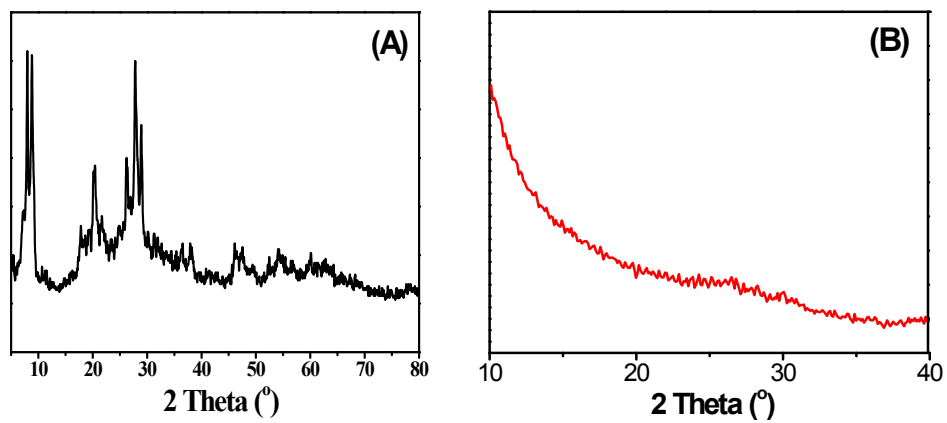

Figure S3. XRD patterns of (A)  $\text{H}_3\text{PMo}_{12}\text{O}_{40}$  and (B)  $\text{PMo}_1@\text{OMP}$ .

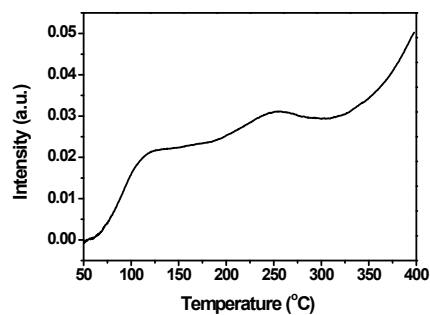

Figure S4.  $\text{NH}_3$ -TPD analysis for  $\text{PMo}_1@\text{OMP}$ .

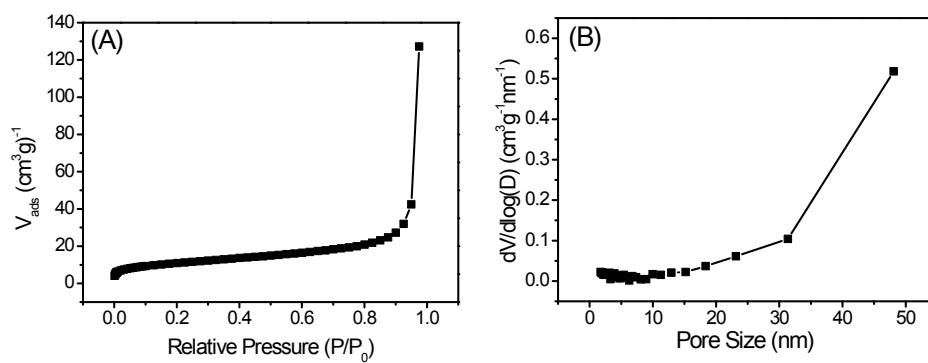

Figure S5. (A)  $\text{N}_2$  adsorption isotherm and (B) BJH pore-size distribution of  $\text{PMo}_1@\text{C}_{100}\text{-AP}$ .

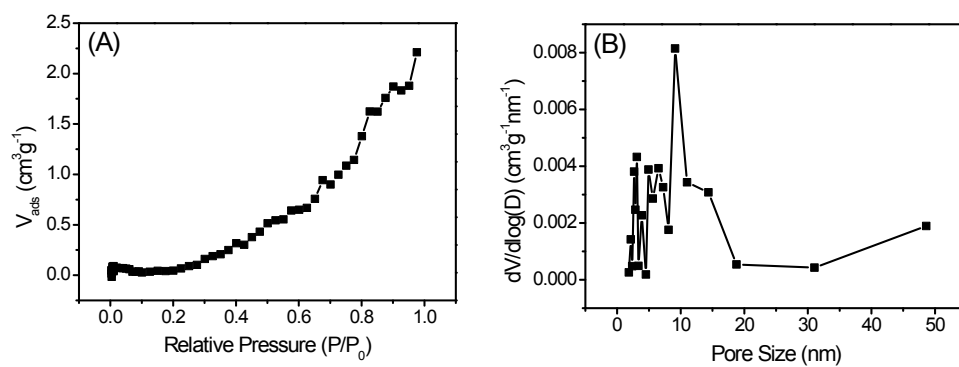

Figure S6.  $N_2$  adsorption isotherm and BJH pore-size distribution of  $PMO_1@C_{no-tannin}$ .

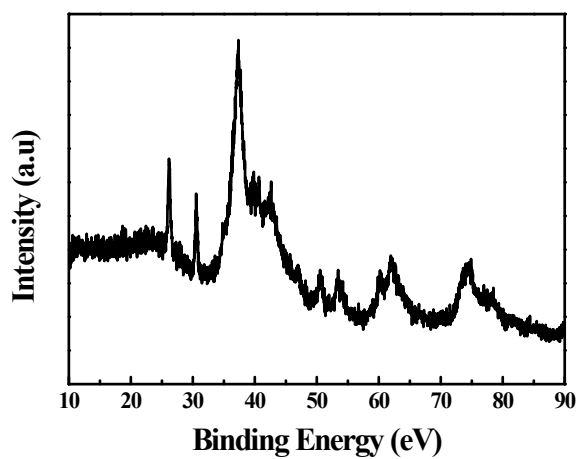

Figure S7. XRD pattern of  $PMO_1@OMC$ .

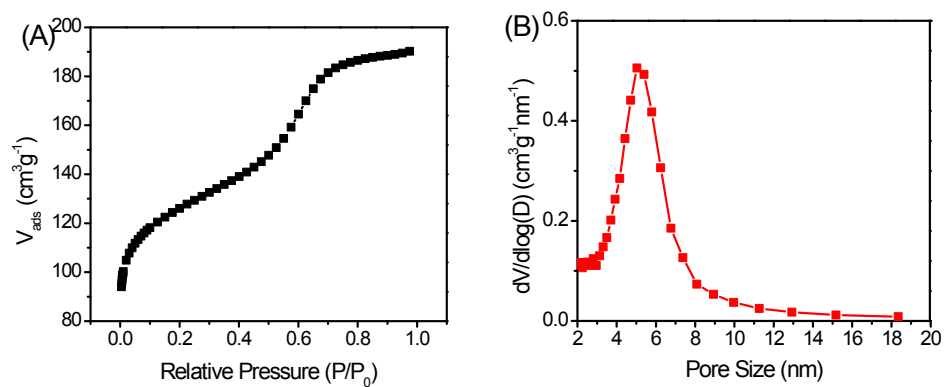

Figure S8. N<sub>2</sub> adsorption isotherm and BJH pore-size distribution of PMo<sub>1</sub>@OMC.

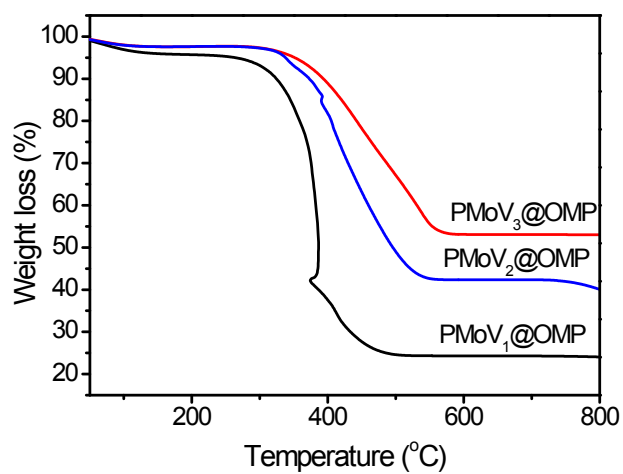

Figure S9. TG curves of PMoV<sub>1</sub>@OMP, PMoV<sub>2</sub>@OMP and PMoV<sub>3</sub>@OMP.

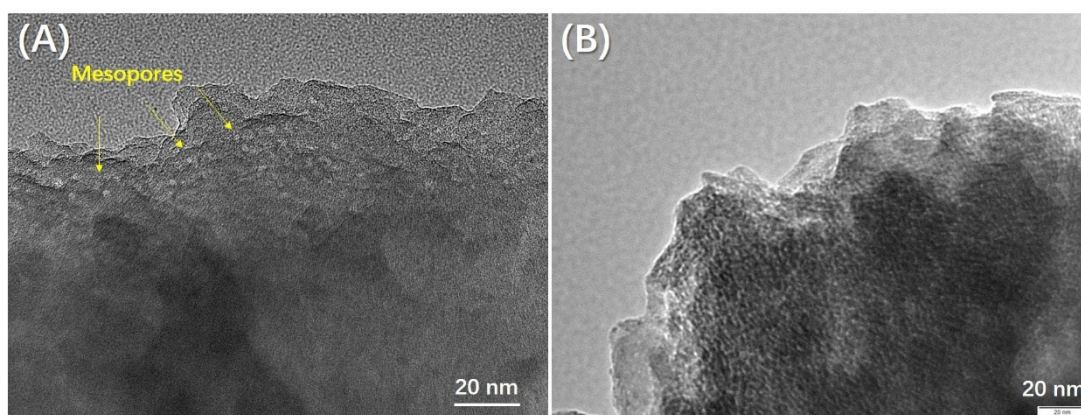

Figure S10. TEM images of (A) PMoV<sub>2</sub>@OMP and (B) PMoV<sub>3</sub>@OMP.

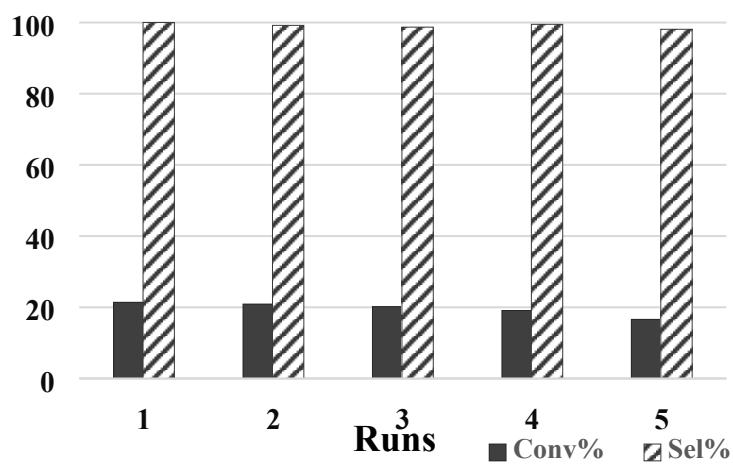

Figure S11. A five-run recycling test for hydroxylation of benzene over  $\text{PMoV}_1\text{@OMP}$ . Reaction conditions: benzene (6 mmol),  $\text{H}_2\text{O}_2$  (18 mmol), acetonitrile (5 mL), acetic acid (1 mL), catalyst  $\text{PMoV}_1\text{@OMP}$  (0.05 g), 80 °C, 3 h.

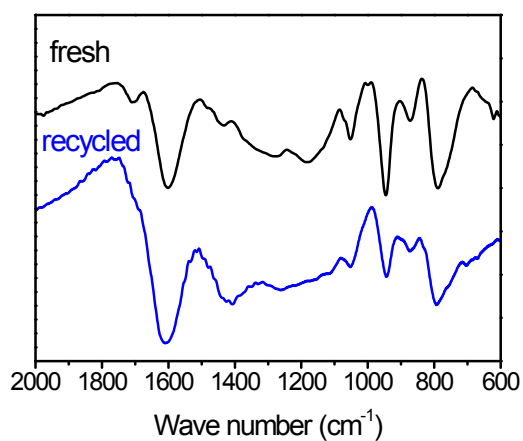

Figure S12. FT-IR spectra for the fresh and recovered catalyst  $\text{PMoV}_1\text{@OMP}$ .

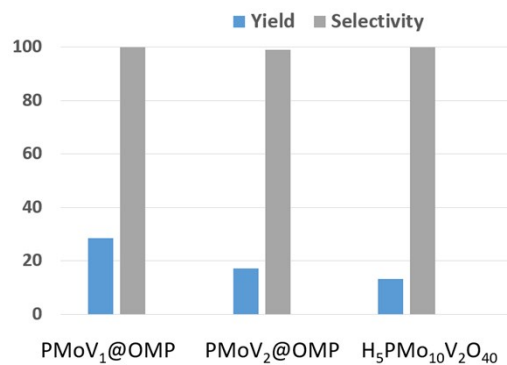

Figure S13. Hydroxylation of benzene over PMoV<sub>1</sub>@OMP, PMoV<sub>2</sub>@OMP, and H<sub>5</sub>PMo<sub>10</sub>V<sub>2</sub>O<sub>40</sub> with fixed active sites. Reaction conditions: benzene (6 mmol), H<sub>2</sub>O<sub>2</sub> (18 mmol), acetonitrile (5 mL), acetic acid (1 mL), PMoV<sub>1</sub>@OMP (0.05 g) (or PMoV<sub>2</sub>@OMP 0.03 g, H<sub>5</sub>PMo<sub>10</sub>V<sub>2</sub>O<sub>40</sub> 0.015 g), 80 °C, 8 h.

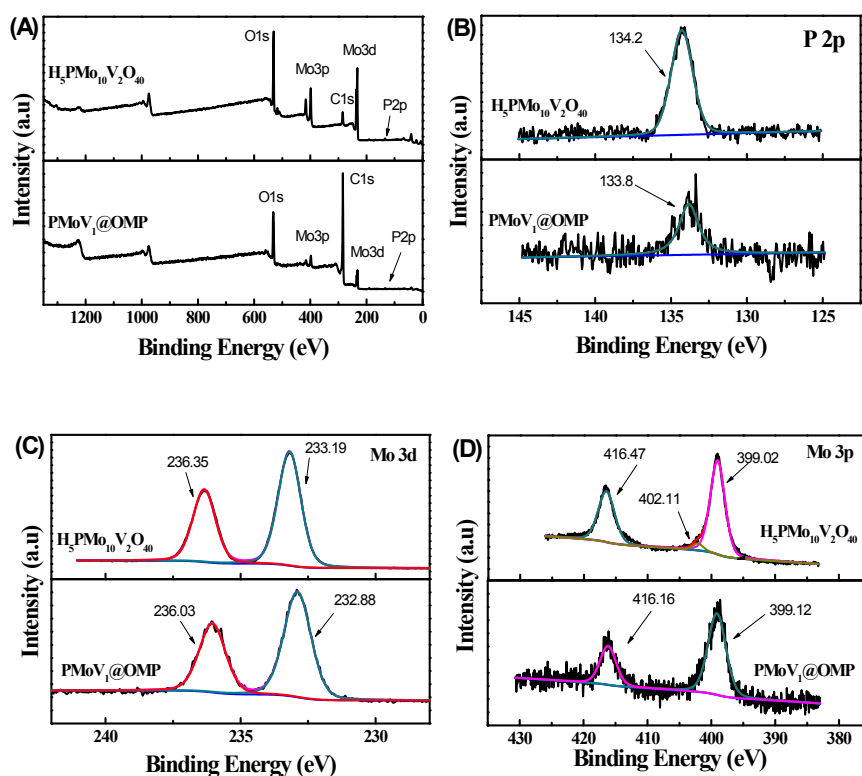

Figure S14. (A) XPS spectra, (B) P 2p spectra, (C) Mo 3d spectra, (D) Mo 3p spectra of H<sub>5</sub>PMo<sub>10</sub>V<sub>2</sub>O<sub>40</sub> and PMoV<sub>1</sub>@OMP.

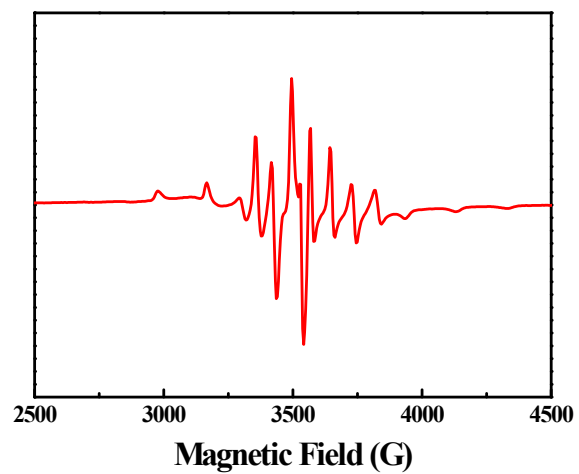

Figure S15. ESR pattern of recovered catalyst PMoV<sub>1</sub>@OMP.
